**TITLE:** AIRWAY RESPONSES TO ARACHIDONIC ACID AFTER THROMBOXANE SYNTHETASE BLOCKADE BY CGS 13080

**AUTHORS:** J. K. Harrington, M.D., G. B. Graybar, M.D., A. W. Grogono, M.D., D. B. McNamara, Ph.D. and P. J. Kadowitz, Ph.D.

**AFFILIATION:** Departments of Anesthesiology and Pharmacology, Tulane Medical School, 1430 Tulane Ave., New Orleans, LA 70112

**Introduction.** The fatty acid precursor arachidonic acid (AA), is converted by most organ systems including the lung, into primary prostaglandins (PG), thromboxane  $A_2$  ( $TxA_2$ ) and prostacyclin ( $PGI_2$ ) via the microsomal cyclooxygenase system.  $TxA_2$  has potent smooth muscle stimulating and platelet aggregating activities. The present study was done to assess the effects of  $TxA_2$  on the airways and systemic circulation of the cat.

**Methods.** Twenty six mongrel cats, unselected as to sex were anesthetized, paralyzed, and mechanically ventilated with room air. Transpulmonary pressure ( $P_{TP}$ ) was measured via a transducer coupled between the tracheal tube and a pleural cannula inserted in the chest. Tidal airflow ( $V_T$ ) was measured by coupling a differential transducer to a pneumotachograph. Tidal volume, lung resistance ( $R_L$ ), and dynamic compliance ( $C_{dyn}$ ) were calculated on a breath-to-breath basis from  $P_{TP}$  and  $V_T$  signals by a Hewlett-Packard respiratory analyzer. Catheters were advanced from a femoral artery for recording aortic blood pressure ( $P_{AO}$ ) and from a femoral vein for IV administration of drugs. Control responses to random doses of AA and U-46619 (a  $TxA_2$  receptor agonist) were obtained in all animals. CGS 13080, 10mg/kg was given. Airway responses and aortic pressure responses were recorded following repeated random doses of AA and U-46619. Sodium meclofenamate 2.5 mg/kg, a cyclooxygenase inhibitor was administered and responses to AA & U-46619 again recorded. Values of all parameters are expressed as mean  $\pm$  standard error.

**Results.** All control IV doses of AA and U-46619 produced dose dependent bronchoconstriction as measured by increases in  $P_{TP}$  (Figure 1). Bronchoconstriction involved both central airways, as measured by increases in  $R_L$ , and peripheral airways, as measured by decreases in  $C_{dyn}$ . Responses to U-46619, the  $TxA_2$  receptor agonist, were not inhibited by either CGS 13080 or meclofenamate (Figure 2). Airway responses to low dose AA (300mg) were diminished 65 to 75% by CGS 13080. Cyclooxygenase inhibition with meclofenamate consistently blocked AA induced changes in  $P_{TP}$ ,  $R_L$ , and  $C_{dyn}$  by 71-88%. AA produced dose-dependent decreases in  $P_{AO}$  which were not blocked by CGS 13080, but which were significantly blocked by meclofenamate. U-46619 produced a brief, dose-dependent, systemic pressor response that was temporally related to increases in  $R_L$ , and that was unaffected by either CGS 13080 or meclofenamate.

**Discussion.** Cyclooxygenase blockade will prevent the bronchoconstriction elicited by AA. Selective  $TxA_2$  synthetase inhibitors have shown the relative contribution of  $TxA_2$  versus the classical PG's. CGS 13080 behaves as a specific  $TxA_2$  synthetase inhibitor in vitro based on microsomal studies conducted from this lab. Furthermore, it did not attenuate the bronchoconstrictive effects of U-46619, indicating CGS is not a receptor antagonist.

Our results suggest that the classical PG's have more peripheral than central airway activity as the AA induced changes in  $C_{dyn}$  were not as attenuated by CGS 13080 as were the changes in  $R_L$ . AA produced a marked systemic vasodepressor response, most likely secondary to  $PGI_2$ . The AA-induced depressor response was preserved following CGS 13080 indicating that it does not interfere with prostacyclin synthetase.  $TxA_2$  synthetase inhibitors may be useful in clinical states associated with increased  $TxA_2$  such as: pulmonary hypertension associated with endotoxemia and ARDS, as well as acute bronchoconstrictive disorders and thrombotic states. In summary the  $TxA_2$  synthetase inhibitors CGS 13080 effectively blocked the bronchoconstrictive effects of AA while preserving its systemic vasodepressor responses.

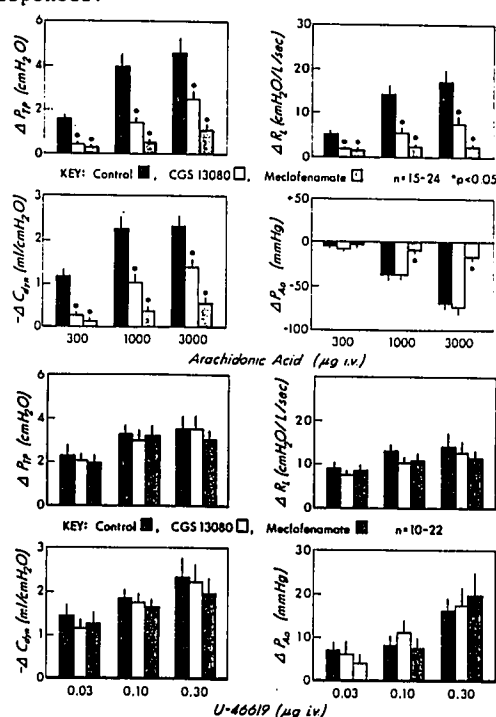

Source: https://asa2.silverchair.com/anesthesiology/article-pdf/61/3/A280/630698/0000542-198409001-00280.pdf
